# Supplementary material
Source: PubMed Central journal article supplement (PMC9136674)
Supplement: jamaoncol-e221479-s00.pdf [file jamaoncol-e221479-s00.pdf]

## Data Sharing Statement

Vesprini. Effect of Supine vs Prone Breast Radiotherapy on Acute Toxic Effects of the Skin Among Women With Large Breast Size. *JAMA Oncol*. Published May 26, 2022.

doi:10.1001/jamaoncol.2022.1479

### Data

**Data available:** No

### Additional Information

**Explanation for why data not available:** Acute toxicity data from a randomized trial and therefore have no utility or value for others and were not included in the REB protocol.
