# Supplementary material
Source: PubMed Central journal article supplement (PMC9136674)
Supplement: jamaoncol-e221479-s002.pdf [file jamaoncol-e221479-s002.pdf]

## Supplemental Online Content

Vesprini D, Davidson M, Bosnic S, et al. Effect of supine vs prone breast radiotherapy on acute toxic effects of the skin among women with large breast size: a randomized clinical trial. *JAMA Oncol*. Published online May 26, 2022. doi:10.1001/jamaoncol.2022.1479

**eTable 1.** Radiation Planning Parameters

**eTable 2.** Patient Characteristics

**eTable 3.** Mean change in Quality of Life scores over time

**eTable 4.** Mean change in QoL scores comparing supine vs prone arms

This supplemental material has been provided by the authors to give readers additional information about their work.

**eTable 1.** Radiation Planning Parameters

| Target                         | Dose-Volume | Planning Objective |
|--------------------------------|-------------|--------------------|
| CTV (Breast)                   | V95% > 99%  | >99%               |
|                                | V105% < 2cc | <2cc               |
| Heart                          | Mean dose   | <300cGy            |
|                                | V50%        | <10%               |
| Lung (bilateral)               | V2000cGy    | <15%               |
|                                | V500cGy     | <20%               |
| Ipsilateral Lung - ExtendRT    | V2000cGy    | <35%               |
|                                | V500cGy     | <45%               |
| Ipsilateral Lung - HypoRT      | V1750cGy    | <35%               |
|                                | V480cGy     | <45%               |
| Contralateral Lung - Extend RT | V500cGy     | <10%               |
| Contralateral Lung - HypoRT    | V480cGy     | <10%               |

Abbreviations: ExtendRT, extended fractionation; HypoRT, hypofractionation

**eTable 2.** Patient characteristics

| Variable                 | All<br>(n=357) | Min-Max, SD | Supine<br>(n=182) | Prone<br>(n=175) | p value |
|--------------------------|----------------|-------------|-------------------|------------------|---------|
| Mean age (years)         | 61             | 29-85, 9.9  | 62                | 61               | 0.11    |
| Mean BMI                 | 33             | 19-34, 17.8 | 34                | 32               | 0.28    |
| Chemotherapy             | 78             | -           | 35                | 43               | 0.22    |
| Cup size<br>> D cup      | 119            | -           | 61                | 58               | 0.94    |
| DD                       | 92             |             | 50                | 42               | 0.46    |
| DDD                      | 8              |             | 3                 | 5                | 0.44    |
| E-I                      | 19             |             | 8                 | 11               | 0.42    |
| Bra size (N > 40 inches) | 108            | -           | 57                | 51               | 0.65    |
| Boost delivery           | 112            | -           | 55                | 57               | 0.63    |
| Hypofractionation        | 177            | -           | 90                | 87               | 0.96    |

Abbreviations: BMI, body mass index; Min, minimum; Max, maximum; SD, standard deviation

**eTable 3.** Mean change in Quality of Life scores over time

| Comparison      | QL2 R | SE   | T     | P    | BRBS R | SE   | T      | P      | PA R  | SE   | T     | P      |
|-----------------|-------|------|-------|------|--------|------|--------|--------|-------|------|-------|--------|
| Supine T0 vs T1 | -4.85 | 2.27 | 2.13  | 0.03 | -22.35 | 2.15 | -10.40 | <.0001 | -9.95 | 2.52 | -3.94 | <.0001 |
| Supine T0 vs T2 | -0.16 | 2.24 | 0.07  | 0.94 | -6.94  | 2.13 | -3.26  | 0.00   | -0.25 | 2.50 | -0.10 | 0.92   |
| Supine T1 vs T2 | 4.68  | 2.28 | -2.05 | 0.04 | 15.41  | 2.16 | 7.13   | <.0001 | 9.70  | 2.54 | 3.82  | <0.01  |
| Prone T1 vs T1  | -1.97 | 2.29 | 0.86  | 0.39 | -19.23 | 2.18 | -8.80  | <.0001 | -6.24 | 2.56 | -2.44 | 0.01   |
| Prone T0 vs T2  | 2.15  | 2.27 | -0.95 | 0.34 | -4.32  | 2.16 | -2.00  | 0.05   | 0.78  | 2.54 | 0.31  | 0.76   |
| Prone T1 vs T2  | 4.12  | 2.32 | -1.78 | 0.08 | 14.90  | 2.22 | 6.73   | <.0001 | 7.02  | 2.59 | 2.71  | 0.01   |

Abbreviations; T0 = pretreatment, T1 = end of treatment, T2 = 6-8 weeks post treatment, QL2 R = mean change in Global Health Status Score, SE = Standard Error, T=T value, P = Pvalue, BRBS R = mean change in Breast Symptoms Scale Mean Change, Pain R = mean change in Pain Scale

**eTable 4.** Mean change in QoL scores comparing supine vs prone arms

| Time point | QL2 R | SE   | T     | P    | BRBS R | SE   | T     | P    | PA R  | SE   | T     | P    |
|------------|-------|------|-------|------|--------|------|-------|------|-------|------|-------|------|
| T0         | 1.25  | 2.24 | 0.56  | 0.58 | -0.70  | 2.12 | -0.33 | 0.74 | -0.51 | 2.50 | -0.21 | 0.84 |
| T1         | -1.62 | 2.32 | -0.70 | 0.48 | 2.42   | 2.21 | 1.10  | 0.27 | 3.20  | 2.58 | 1.24  | 0.22 |
| T2         | -1.06 | 2.28 | -0.47 | 0.64 | 1.92   | 2.17 | 0.88  | 0.38 | 0.52  | 2.55 | 0.20  | 0.84 |

Abbreviations; T0 = pretreatment, T1 = end of treatment, T2 = 6-8 weeks post treatment, QL2 R = mean change in Global Health Status Score, SE = Standard Error, T=T value, P = Pvalue, BRBS R = mean change in Breast Symptoms Scale Mean Change, Pain R = mean change in Pain Scale
